# Supplementary material for: Association of Endotracheal Aspirate Culture Variability and Antibiotic Use in Mechanically Ventilated Pediatric Patients
Source: PubMed Central journal article supplement (PMC8696566; doi:10.1001/jamanetworkopen.2021.40378), 2021-12-22
Supplement: jamanetwopen-e2140378-s001.pdf [file jamanetwopen-e2140378-s001.pdf]

## Supplemental Online Content

Prinzi A, Parker SK, Thurm C, Birkholz M, Sick-Samuels A. Association of endotracheal aspirate culture variability and antibiotic use in mechanically ventilated pediatric patients. *JAMA Netw Open*. 2021;4(12):e2140378. doi:10.1001/jamanetworkopen.2021.40378

**eTable 1.** Billing Codes

**eTable 2.** Included Antibiotics

**eTable 3.** Excluded Antibiotics

**eTable 4.** Association Between Complex Chronic Conditions and Receiving EAC Testing

This supplemental material has been provided by the authors to give readers additional information about their work.

**eTable 1. Billing Codes**

| <b>Study Data Point</b> | <b>Associated Billing Code(s)</b> | <b>Code Description</b>                                           | <b>Relevant keywords</b>                                                     | <b>Additional Notes</b>                                                                                                                                |
|-------------------------|-----------------------------------|-------------------------------------------------------------------|------------------------------------------------------------------------------|--------------------------------------------------------------------------------------------------------------------------------------------------------|
| Mechanical Ventilation  | 521166<br>521169                  | Mechanical ventilation<br>Other unspecified ventilator assistance | N/A                                                                          | CTC daily mechanical ventilation code used rather than ICD-10 code for intubation procedure because the ICD-10 code does not reflect daily ventilation |
| Lab Test                | 361110                            | Aerobic culture                                                   | Sources include respiratory tract, sputum, nasopharyngeal, other/unspecified | Hospital charge description keywords: tracheal aspirate, trach, endotracheal, TA, respiratory, nasopharyngeal, sputum                                  |

**eTable 2. Included Antibiotics**

| <b>All Antibiotics</b>              | <b>Anti-Pseudomonas</b>              | <b>Anti-Staphylococcus</b>                       |
|-------------------------------------|--------------------------------------|--------------------------------------------------|
| Amikacin sulfate (parenteral)       | Amikacin sulfate (parenteral)        | Amoxicillin/clavulanic acid (oral)               |
| Amoxicillin/clavulanic acid (oral)  | Aztreonam (parenteral)               | Ampicillin/sulbactam (parenteral)                |
| Amoxicillin (oral)                  | Cefepime (parenteral)                | Cefazolin sodium (parenteral)                    |
| Ampicillin/sulbactam (parenteral)   | Ciprofloxacin (oral, parenteral)     | Ceftaroline (parenteral)                         |
| Ampicillin (parenteral)             | Gentamicin (parenteral)              | Clindamycin (parenteral)                         |
| Azithromycin (oral, parenteral)     | Imipenem (parenteral)                | Daptomycin                                       |
| Aztreonam (parenteral)              | Levofloxacin (oral, parenteral)      | Linezolid (oral, parenteral)                     |
| Cefazolin sodium (parenteral)       | Meropenem (parenteral)               | Oxacillin (parenteral)                           |
| Cefdinir (oral)                     | Piperacillin/tazobactam (parenteral) | Sulfamethoxazole/trimethoprim (oral, parenteral) |
| Cefepime (parenteral)               | Tobramycin (parenteral)              | Vancomycin (parenteral)                          |
| Cefotaxime (parenteral)             |                                      |                                                  |
| Cefoxitin (parenteral)              |                                      |                                                  |
| Ceftaroline (parenteral)            |                                      |                                                  |
| Ceftazidime/avibactam (parenteral)  |                                      |                                                  |
| Ceftazidime (parenteral)            |                                      |                                                  |
| Ceftolozane/tazobactam (parenteral) |                                      |                                                  |
| Ceftriaxone (parenteral)            |                                      |                                                  |
| Cephalexin (oral)                   |                                      |                                                  |
| Ciprofloxacin (oral, parenteral)    |                                      |                                                  |
| Clarithromycin (oral)               |                                      |                                                  |
| Clindamycin (oral)                  |                                      |                                                  |
| Daptomycin                          |                                      |                                                  |
| Doxycycline (parenteral)            |                                      |                                                  |
| Gentamicin (parenteral)             |                                      |                                                  |
| Imipenem (parenteral)               |                                      |                                                  |
| Levofloxacin (oral, parenteral)     |                                      |                                                  |
| Linezolid (oral, parenteral)        |                                      |                                                  |
| Meropenem (parenteral)              |                                      |                                                  |
| Moxifloxacin (oral, parenteral)     |                                      |                                                  |
| Nafcillin (parenteral)              |                                      |                                                  |

|                                                  |  |  |
|--------------------------------------------------|--|--|
| Oxacillin (parenteral)                           |  |  |
| Penicillin G (parenteral)                        |  |  |
| Penicillin V (oral)                              |  |  |
| Piperacillin/tazobactam (parenteral)             |  |  |
| Polymyxin B sulfate (parenteral)                 |  |  |
| Sulfamethoxazole/trimethoprim (oral, parenteral) |  |  |
| Tobramycin (parenteral)                          |  |  |
| Vancomycin (parenteral)                          |  |  |

**eTable 3. Excluded Antibiotics**

| <b>Antibiotic Name</b> | <b>Reason for Exclusion</b>                 |
|------------------------|---------------------------------------------|
| Amikacin, inhaled      | Inhaled                                     |
| Metronidazole          | Unlikely to be used clinically              |
| Vancomycin, inhaled    | Inhaled, small n (n=5)                      |
| Tobramycin, inhaled    | Inhaled                                     |
| Cefixime, oral         | Uncommonly used for VAI, small n (n=12)     |
| Tobramycin, inhaled    | Inhaled                                     |
| Cefuroxime, inhaled    | Inhaled, small n (n=13)                     |
| Cefuroxime, all        | Not a typical inpatient drug                |
| Aztreonam, inhaled     | Inhaled, small n (n=5)                      |
| Tigecycline            | Small n (n=4)                               |
| Colistin, inhaled      | Inhaled, small n (n=10)                     |
| Cefuroxime, oral       | Not a typical inpatient drug, small n (n=7) |
| Gentamicin, inhaled    | Inhaled, small n (n=6)                      |
| Cefotetan              | Small n (n=1)                               |
| Cefpodoxime            | Small n (n=2)                               |
| Cefprozil              | Small n (n=4)                               |
| ceftazidime, inhaled   | Inhaled, small n (n=1)                      |
| Omadacycline           | Small n (n=1)                               |

**eTable 4. Association Between Complex Chronic Conditions and Receiving EAC Testing**

| <b>Variable</b>                    | <b>Total</b>   | <b>Ventilated Patients without EAC<br/>N (%)</b> | <b>Ventilated Patients with EAC<br/>N (%)</b> | <b>P-value</b> |
|------------------------------------|----------------|--------------------------------------------------|-----------------------------------------------|----------------|
| Any Complex Chronic                | 118,655 (78%)  | 84,029 (75%)                                     | 34,626 (86.5%)                                | < 0.001        |
| # Complex Chronic Conditions:      |                |                                                  |                                               |                |
| No CCCs                            | 33,477 (22%)   | 28,052 (25%)                                     | 5,425 (13.5%)                                 |                |
| 1 CCC                              | 36,649 (24.1%) | 30,797 (27.5%)                                   | 5,852 (14.6%)                                 |                |
| 2 CCCs                             | 22,475 (14.8%) | 17,727 (15.8%)                                   | 4,748 (11.9%)                                 |                |
| 3+ CCCs                            | 59,531 (39.1%) | 35,505 (31.7%)                                   | 24,026 (60%)                                  | < 0.001        |
| Cardiovascular                     | 56,223 (37%)   | 39,610 (35.3%)                                   | 16,613 (41.5%)                                | < 0.001        |
| Neurologic and neuromuscular       | 36,032 (23.7%) | 22,039 (19.7%)                                   | 13,993 (34.9%)                                | < 0.001        |
| Respiratory                        | 30,329 (19.9%) | 15,290 (13.6%)                                   | 15,039 (37.5%)                                | < 0.001        |
| Renal and urologic                 | 15,557 (10.2%) | 10,115 (9%)                                      | 5,442 (13.6%)                                 | < 0.001        |
| Gastrointestinal                   | 46,303 (30.4%) | 27,640 (24.7%)                                   | 18,663 (46.6%)                                | < 0.001        |
| Hematology and immunodeficiency    | 8,914 (5.9%)   | 5,324 (4.8%)                                     | 3,590 (9%)                                    | < 0.001        |
| Metabolic                          | 16,218 (10.7%) | 9,437 (8.4%)                                     | 6,781 (16.9%)                                 | < 0.001        |
| Other congenital or genetic defect | 23,752 (15.6%) | 15,990 (14.3%)                                   | 7,762 (19.4%)                                 | < 0.001        |
| Malignancy                         | 6,512 (4.3%)   | 4,315 (3.8%)                                     | 2,197 (5.5%)                                  | < 0.001        |
| Neonatal                           | 33,900 (22.3%) | 24,991 (22.3%)                                   | 8,909 (22.2%)                                 | 0.826          |
| Technology dependency              | 55,310 (36.4%) | 32,711 (29.2%)                                   | 22,599 (56.4%)                                | < 0.001        |
| Transplantation                    | 2,612 (1.7%)   | 1,652 (1.5%)                                     | 960 (2.4%)                                    | < 0.001        |
